# Supplementary material for: Identification of novel HIV-1 dependency factors in primary CCR4+CCR6+Th17 cells via a genome-wide transcriptional approach
Source: PubMed Central journal article supplement (PMC4676116; doi:10.1186/s12977-015-0226-9), 2015-12-10

## C2. Canonical pathways Th17 vs. Th1

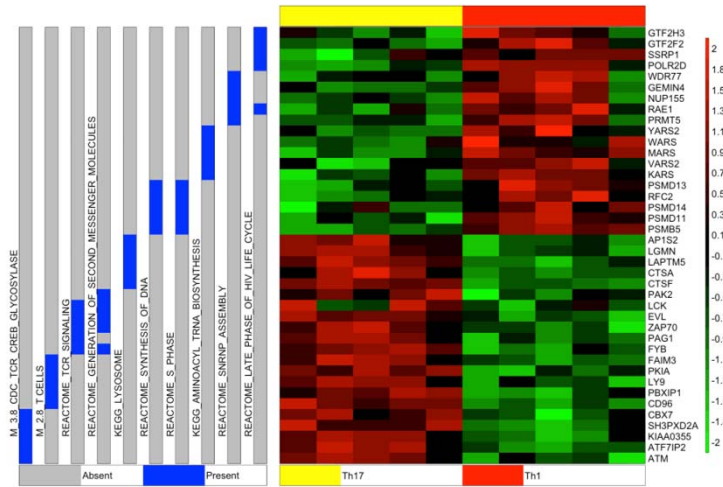

## C3. Transcription factors Th17 vs. Th1

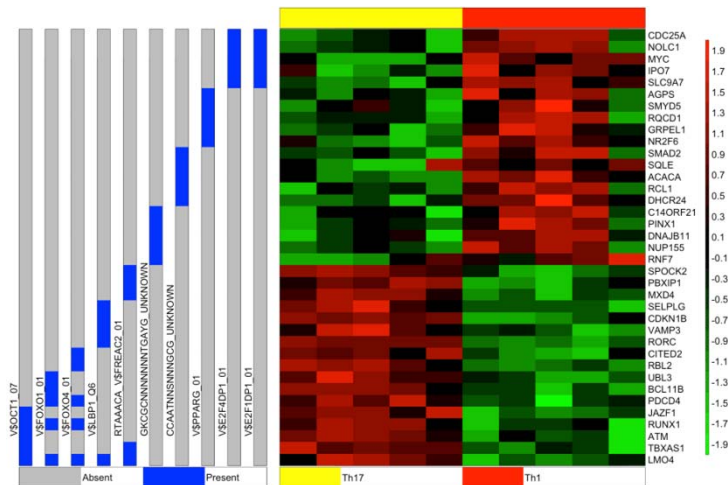

## C5. Biological processes Th17 vs. Th1

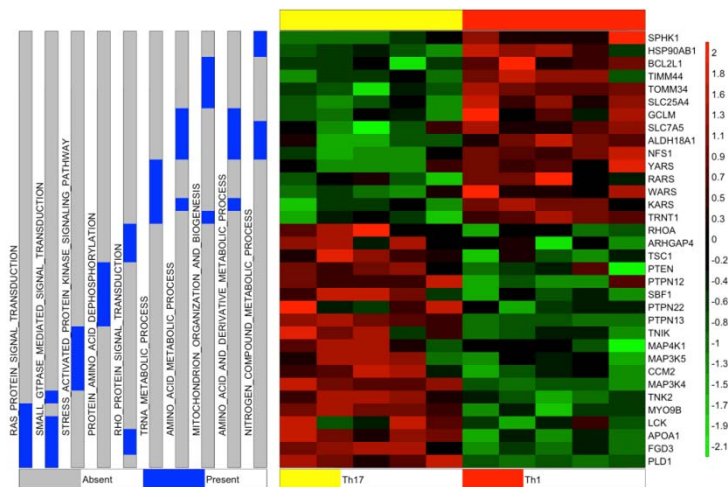

Supplement: 12977_2015_226_MOESM5_ESM.pdf [file 12977_2015_226_MOESM5_ESM.pdf]
